# Supplementary material
Source: publisher site journal article supplement (https://www.spandidos-publications.com/2403/downloadSupplementary)
Supplement: Supplementary file 1 [file downloadSupplementary]

## Sheet: Table SIII
Table SIII: Information about the coexpression genes of P4HB
gene1	gene2	gene2Type	cor	p-value
P4HB	P4HB	protein_coding	1	0
P4HB	ANAPC11	protein_coding	0.626	2.14e-48
P4HB	CENPX	protein_coding	0.596	5.37e-43
P4HB	CALR	protein_coding	0.576	1.39e-39
P4HB	SLC39A7	protein_coding	0.576	1.29e-39
P4HB	CCDC137	protein_coding	0.576	1.28e-39
P4HB	GPS1	protein_coding	0.575	1.84e-39
P4HB	CYB561	protein_coding	0.571	7.47e-39
P4HB	RPN1	protein_coding	0.568	1.99e-38
P4HB	TMED3	protein_coding	0.552	6.51e-36
P4HB	LRRC45	protein_coding	0.546	4.96e-35
P4HB	SDF4	protein_coding	0.545	8.22e-35
P4HB	TK1	protein_coding	0.544	9.92e-35
P4HB	RPN2	protein_coding	0.541	2.62e-34
P4HB	SEC61A1	protein_coding	0.54	3.67e-34
P4HB	DDOST	protein_coding	0.539	5.45e-34
P4HB	MYDGF	protein_coding	0.537	9.17e-34
P4HB	KDELR2	protein_coding	0.527	2.64e-32
P4HB	TMEM214	protein_coding	0.525	4.91e-32
P4HB	SYNGR2	protein_coding	0.522	1.36e-31
P4HB	PQLC2	protein_coding	0.52	2.49e-31
P4HB	OGFOD3	protein_coding	0.52	2.2e-31
P4HB	ARHGDIA	protein_coding	0.52	2.68e-31
P4HB	PDIA4	protein_coding	0.519	3.53e-31
P4HB	NEU1	protein_coding	0.519	3.29e-31
P4HB	SLC35A2	protein_coding	0.512	2.55e-30
P4HB	MRPL12	protein_coding	0.512	2.39e-30
P4HB	GALK1	protein_coding	0.511	3.25e-30
P4HB	SLC35B1	protein_coding	0.509	6.33e-30
P4HB	MRPS7	protein_coding	0.506	1.44e-29
P4HB	SMARCD2	protein_coding	0.502	5.3e-29
P4HB	JPT1	protein_coding	0.499	1.15e-28
P4HB	NECTIN2	protein_coding	0.499	1.05e-28
P4HB	CLPTM1	protein_coding	0.499	1.36e-28
P4HB	RER1	protein_coding	0.499	1.24e-28
P4HB	DCXR	protein_coding	0.497	2.32e-28
P4HB	SLC39A11	protein_coding	0.497	1.92e-28
P4HB	TMED9	protein_coding	0.496	3.18e-28
P4HB	SLC52A2	protein_coding	0.493	5.88e-28
P4HB	LRRC59	protein_coding	0.492	8.76e-28
P4HB	COPG1	protein_coding	0.491	1.12e-27
P4HB	GRN	protein_coding	0.491	1.23e-27
P4HB	TACO1	protein_coding	0.49	1.59e-27
P4HB	YIPF2	protein_coding	0.489	2.27e-27
P4HB	MOGS	protein_coding	0.489	2.25e-27
P4HB	VAMP8	protein_coding	0.489	1.87e-27
P4HB	CPTP	protein_coding	0.488	2.63e-27
P4HB	ATP6AP1	protein_coding	0.487	3.68e-27
P4HB	DUS1L	protein_coding	0.485	6.68e-27
P4HB	UBAC2	protein_coding	0.484	7.67e-27
P4HB	YIF1A	protein_coding	0.481	2.09e-26
P4HB	TMEM104	protein_coding	0.481	1.88e-26
P4HB	SIRT7	protein_coding	0.479	3.55e-26
P4HB	ATP6V0B	protein_coding	0.479	3.02e-26
P4HB	SDF2	protein_coding	0.478	3.87e-26
P4HB	SPINT1	protein_coding	0.478	4.38e-26
P4HB	PREB	protein_coding	0.476	7.47e-26
P4HB	ALYREF	protein_coding	0.476	6.79e-26
P4HB	CTSA	protein_coding	0.475	8.99e-26
P4HB	RFNG	protein_coding	0.475	1.05e-25
P4HB	MED8	protein_coding	0.475	9.91e-26
P4HB	SLC25A39	protein_coding	0.475	1.02e-25
P4HB	PSMD3	protein_coding	0.473	1.48e-25
P4HB	BCL2L12	protein_coding	0.471	2.49e-25
P4HB	ELOVL1	protein_coding	0.468	5.76e-25
P4HB	PDIA3	protein_coding	0.468	6.7e-25
P4HB	MANF	protein_coding	0.466	8.78e-25
P4HB	SLC38A10	protein_coding	0.464	1.77e-24
P4HB	YIF1B	protein_coding	0.464	1.82e-24
P4HB	DNASE2	protein_coding	0.463	1.96e-24
P4HB	COASY	protein_coding	0.463	2.42e-24
P4HB	CANT1	protein_coding	0.462	3.11e-24
P4HB	MRPL58	protein_coding	0.461	3.74e-24
P4HB	BIRC5	protein_coding	0.46	4.6e-24
P4HB	NME1	protein_coding	0.459	6.31e-24
P4HB	SDF2L1	protein_coding	0.458	8.29e-24
P4HB	SEC13	protein_coding	0.458	8.4e-24
P4HB	ALG3	protein_coding	0.457	9.15e-24
P4HB	SLC25A10	protein_coding	0.456	1.31e-23
P4HB	POR	protein_coding	0.456	1.36e-23
P4HB	VPS25	protein_coding	0.455	1.76e-23
P4HB	ERAL1	protein_coding	0.455	1.7e-23
P4HB	OXLD1	protein_coding	0.453	2.45e-23
P4HB	PPIB	protein_coding	0.453	2.99e-23
P4HB	CCDC167	protein_coding	0.453	2.79e-23
P4HB	CYBC1	protein_coding	0.452	3.07e-23
P4HB	NSDHL	protein_coding	0.452	3.57e-23
P4HB	PPP1CA	protein_coding	0.45	5.97e-23
P4HB	NPLOC4	protein_coding	0.45	6.28e-23
P4HB	GGCX	protein_coding	0.45	5.33e-23
P4HB	EIF4A3	protein_coding	0.45	5.17e-23
P4HB	MAN1B1	protein_coding	0.447	1.2e-22
P4HB	SCAMP3	protein_coding	0.446	1.57e-22
P4HB	MED19	protein_coding	0.445	1.89e-22
P4HB	TBCD	protein_coding	0.445	1.72e-22
P4HB	STT3A	protein_coding	0.444	2.19e-22
P4HB	PRDX4	protein_coding	0.443	2.79e-22
P4HB	PLOD1	protein_coding	0.443	3.06e-22
P4HB	SRP68	protein_coding	0.442	4.01e-22
P4HB	EBP	protein_coding	0.441	5.48e-22
P4HB	KRT18	protein_coding	0.441	4.61e-22
P4HB	DNAJB11	protein_coding	0.44	5.81e-22
P4HB	ATAD3A	protein_coding	0.439	8.39e-22
P4HB	XYLT2	protein_coding	0.438	9.88e-22
P4HB	NUP85	protein_coding	0.438	1.02e-21
P4HB	PHB	protein_coding	0.437	1.43e-21
P4HB	UBALD2	protein_coding	0.437	1.42e-21
P4HB	AURKAIP1	protein_coding	0.436	1.44e-21
P4HB	AUP1	protein_coding	0.435	2.04e-21
P4HB	CAPG	protein_coding	0.433	3.43e-21
P4HB	UQCC3	protein_coding	0.433	3.18e-21
P4HB	FOXK2	protein_coding	0.432	4.07e-21
P4HB	ZFYVE19	protein_coding	0.432	4.42e-21
P4HB	GMPPA	protein_coding	0.432	4.33e-21
P4HB	TMEM132A	protein_coding	0.431	5.62e-21
P4HB	PIGU	protein_coding	0.431	5.43e-21
P4HB	HM13	protein_coding	0.429	8.24e-21
P4HB	KDELR1	protein_coding	0.429	9.15e-21
P4HB	SLC50A1	protein_coding	0.429	7.64e-21
P4HB	ERGIC3	protein_coding	0.429	9.04e-21
P4HB	UBE2C	protein_coding	0.428	1.13e-20
P4HB	SLC9A3R1	protein_coding	0.426	1.69e-20
P4HB	TMEM147	protein_coding	0.425	2e-20
P4HB	PUSL1	protein_coding	0.425	2.06e-20
P4HB	PCYT2	protein_coding	0.425	1.9e-20
P4HB	LMAN2	protein_coding	0.425	2.11e-20
P4HB	TMC6	protein_coding	0.424	2.31e-20
P4HB	PSMG3	protein_coding	0.424	2.79e-20
P4HB	C1orf122	protein_coding	0.423	3.08e-20
P4HB	ECE2	protein_coding	0.422	3.67e-20
P4HB	OTX1	protein_coding	0.422	3.91e-20
P4HB	POP7	protein_coding	0.421	4.95e-20
P4HB	FAAP24	protein_coding	0.421	4.69e-20
P4HB	ORMDL2	protein_coding	0.42	5.69e-20
P4HB	HSPA5	protein_coding	0.419	7.98e-20
P4HB	KIAA2013	protein_coding	0.419	8.59e-20
P4HB	PSMC5	protein_coding	0.419	7.89e-20
P4HB	SRPRB	protein_coding	0.419	7.21e-20
P4HB	TLCD1	protein_coding	0.419	8.29e-20
P4HB	ADPRHL2	protein_coding	0.417	1.12e-19
P4HB	MRPL14	protein_coding	0.417	1.24e-19
P4HB	TMUB1	protein_coding	0.417	1.24e-19
P4HB	CHMP6	protein_coding	0.417	1.25e-19
P4HB	ZDHHC12	protein_coding	0.416	1.37e-19
P4HB	RNF181	protein_coding	0.416	1.58e-19
P4HB	RAD51	protein_coding	0.415	2.07e-19
P4HB	AP2S1	protein_coding	0.415	2.03e-19
P4HB	EFNA4	protein_coding	0.415	1.86e-19
P4HB	DHCR7	protein_coding	0.415	1.96e-19
P4HB	DBI	protein_coding	0.415	1.83e-19
P4HB	RCC1	protein_coding	0.415	1.81e-19
P4HB	PLA2G15	protein_coding	0.415	2.07e-19
P4HB	TPRA1	protein_coding	0.415	1.82e-19
P4HB	CST6	protein_coding	0.414	2.39e-19
P4HB	ABCF3	protein_coding	0.414	2.11e-19
P4HB	ABHD12	protein_coding	0.413	3.01e-19
P4HB	FTSJ3	protein_coding	0.413	2.84e-19
P4HB	CDK16	protein_coding	0.413	2.83e-19
P4HB	MRPS23	protein_coding	0.413	3.06e-19
P4HB	BCAP31	protein_coding	0.413	3.21e-19
P4HB	MRPL27	protein_coding	0.412	3.39e-19
P4HB	SCYL1	protein_coding	0.412	3.53e-19
P4HB	POC1A	protein_coding	0.412	3.84e-19
P4HB	BRMS1	protein_coding	0.412	3.83e-19
P4HB	PKMYT1	protein_coding	0.411	4.45e-19
P4HB	POLR2G	protein_coding	0.411	4.58e-19
P4HB	PGP	protein_coding	0.411	4.17e-19
P4HB	RAB5IF	protein_coding	0.411	4.39e-19
P4HB	EIPR1	protein_coding	0.41	4.97e-19
P4HB	SELENOH	protein_coding	0.41	5.68e-19
P4HB	PRPSAP1	protein_coding	0.409	6.65e-19
P4HB	ST14	protein_coding	0.409	7.51e-19
P4HB	PAFAH1B3	protein_coding	0.407	1.1e-18
P4HB	APMAP	protein_coding	0.407	1.09e-18
P4HB	H2AFX	protein_coding	0.406	1.18e-18
P4HB	CDC20	protein_coding	0.406	1.35e-18
P4HB	TEDC2	protein_coding	0.406	1.36e-18
P4HB	POLDIP2	protein_coding	0.406	1.27e-18
P4HB	CENPM	protein_coding	0.406	1.41e-18
P4HB	MFSD11	protein_coding	0.406	1.26e-18
P4HB	CDC6	protein_coding	0.405	1.64e-18
P4HB	PRR19	protein_coding	0.405	1.63e-18
P4HB	NAGLU	protein_coding	0.405	1.75e-18
P4HB	C1QTNF6	protein_coding	0.405	1.76e-18
P4HB	OSTC	protein_coding	0.405	1.71e-18
P4HB	ASF1B	protein_coding	0.404	1.89e-18
P4HB	EDEM2	protein_coding	0.404	1.84e-18
P4HB	NOP10	protein_coding	0.404	2.17e-18
P4HB	GGCT	protein_coding	0.404	2.07e-18
P4HB	ZFPL1	protein_coding	0.403	2.34e-18
P4HB	CHPF	protein_coding	0.403	2.37e-18
P4HB	CFL1	protein_coding	0.403	2.69e-18
P4HB	SSU72	protein_coding	0.402	3.23e-18
P4HB	C11orf98	protein_coding	0.402	3.28e-18
P4HB	NAGK	protein_coding	0.402	3.25e-18
P4HB	JTB	protein_coding	0.402	2.95e-18
P4HB	TMEM208	protein_coding	0.402	3.33e-18
P4HB	FKBPL	protein_coding	0.402	2.77e-18
P4HB	CHMP4B	protein_coding	0.402	3.08e-18
P4HB	TMEM258	protein_coding	0.401	3.43e-18
P4HB	BLOC1S3	protein_coding	0.401	3.96e-18
P4HB	PHF21A	protein_coding	-0.401	3.43e-18
P4HB	MARF1	protein_coding	-0.404	1.87e-18
P4HB	PPP1R12A	protein_coding	-0.405	1.64e-18
P4HB	PNISR	protein_coding	-0.405	1.59e-18
P4HB	TRAF5	protein_coding	-0.406	1.38e-18
P4HB	TNRC6B	protein_coding	-0.408	8.94e-19
P4HB	PTBP2	protein_coding	-0.409	6.56e-19
P4HB	LYRM7	protein_coding	-0.41	6.11e-19
P4HB	PRR26	protein_coding	-0.414	2.38e-19
P4HB	SENP6	protein_coding	-0.415	1.91e-19
P4HB	DOP1A	protein_coding	-0.415	1.98e-19
P4HB	CHD9	protein_coding	-0.419	8.23e-20
P4HB	KMT2A	protein_coding	-0.42	5.88e-20
P4HB	AC119396.1	protein_coding	-0.42	6.64e-20
P4HB	GPATCH2L	protein_coding	-0.421	4.99e-20
P4HB	FBXO30	protein_coding	-0.421	4.54e-20
P4HB	RALGAPA1	protein_coding	-0.422	3.84e-20
P4HB	ATG2B	protein_coding	-0.422	4.35e-20
P4HB	GPR135	protein_coding	-0.423	3.28e-20
P4HB	PJA2	protein_coding	-0.424	2.72e-20
P4HB	CHD1	protein_coding	-0.426	1.79e-20
P4HB	TTBK2	protein_coding	-0.427	1.2e-20
P4HB	ELMSAN1	protein_coding	-0.428	1.12e-20
P4HB	REV3L	protein_coding	-0.429	8.78e-21
P4HB	TUBE1	protein_coding	-0.43	7.02e-21
P4HB	ZSWIM6	protein_coding	-0.43	6.48e-21
P4HB	TOGARAM1	protein_coding	-0.431	5.08e-21
P4HB	CREBRF	protein_coding	-0.446	1.49e-22
P4HB	HERC1	protein_coding	-0.449	6.77e-23
P4HB	EPM2A	protein_coding	-0.452	3.64e-23
P4HB	ARID4A	protein_coding	-0.457	1.1e-23
P4HB	MTR	protein_coding	-0.462	2.78e-24
P4HB	KPNA5	protein_coding	-0.48	2.55e-26
